# Supplementary material
Source: PubMed Central journal article supplement (PMC4272594)
Supplement: JB.02145-14_zjb999093453so1.pdf [file JB.02145-14_zjb999093453so1.pdf]

# The *trpE* gene negatively regulates differentiation of heterocysts at the level of induction in *Anabaena* sp. strain PCC 7120

Patrick Videau<sup>1</sup>, Loralyn M. Cozy<sup>1,3</sup>, Jasmine E. Young<sup>1</sup>, Blake Ushijima<sup>1</sup>, Reid T. Oshiro<sup>1</sup>, Orion S. Rivers<sup>1</sup>, Andrew H. Burger<sup>2</sup>, and Sean M. Callahan<sup>1,2,#</sup>

<sup>1</sup>Department of Microbiology, University of Hawaii, Honolulu, HI 96822, USA

<sup>2</sup>Department of Molecular Biosciences and Bioengineering, University of Hawaii, Honolulu, HI 96822, USA

Present address: <sup>3</sup>Department of Biology, Illinois Wesleyan University, Bloomington, IL 61702, USA

#Correspondence: SM Callahan, University of Hawaii, Department of Microbiology, 2538 McCarthy Mall, 207 Snyder Hall, Honolulu, HI 96822, USA.

Email: scallaha@hawaii.edu

## Supporting Information

Table S1. Oligonucleotide primers used in this study.

| Oligonucleotide <sup>a</sup> | Sequence                                                        |
|------------------------------|-----------------------------------------------------------------|
| 233-F3-EcoRI                 | TATAGAATTCCTTATCAACCTATTTAGTGG                                  |
| 233-R1-BamHI                 | TATAGGATCCTTTGAGCATTTTCTACTAGG                                  |
| alr3233-up-F                 | GGATCCGAGTGTTTCAGTATTAATTGTTGAATTAC                             |
| alr3233-up-R                 | CTAAAGTTTGCCCGGGCACCTCGGTTGTGCTACGAGATACGCG                     |
| alr3233-dn-F                 | AACCGAGGTGCCCGGGCAAACCTTAGAAACATCAATTTACTC                      |
| alr3233-dn-R                 | GAGCTCACGGTTGGCGCAGCAGTTAATTGGCGTTGTAAAG                        |
| araC-dBam-OEX-F              | AGATTAGCAGATCCTACCTGACGC                                        |
| araC-dBam-OEX-R              | GTAGGATCTGCTAATCTTATGGATA                                       |
| araC-XhoI-F                  | ATATACTCGAGTTATGACAACCTTGACGGCTACATCATTAC                       |
| K12-PlacZ-F                  | TATCTCACTCGCAATCAAATTCAGCC                                      |
| K12-PlacZ-R                  | AATCCTGTTTGATGGTGGTTAACGGC                                      |
| PmrBAD-BaS-SacI-R            | TATATGAGCTCATCCCGGGATGGATCCACTCCATCCAAAAAACGG<br>GTATGGAGAAACAG |
| PpetE-EcoRI-SmaI-BamHI-R     | TATATGGATCCATCCCGGGATGAATTCTCCTAACCTGTAGTTTTATTT<br>TTCTTATTTT  |
| PpetE-SacI-F                 | ATATAGAGCTCGCTGAGGTACTGA                                        |
| PpetE-XhoI-F                 | TATATCTCGAGGCTGAGGTACTGAGTACACAGC                               |
| PpetE-YFP-OEX-F              | GAGAACGCCATGAGCAGCGGCCCTGCTG                                    |
| PpetE-YFP-OEX-R              | CTGCTCATGGCGTTCTCCTAACCTGTAGTT                                  |
| PtpE-BamHI-F                 | ATATAGGATCCTTCAGTTACCAATAGAACTATCAGCCATATAG                     |
| PtpE-OEX-R                   | CCTTCTTAAATCTAGAGTTACCAAGGGTTGTGTAAGCAAGTGTATAG                 |

|                               |                                                              |
|-------------------------------|--------------------------------------------------------------|
| P <sub>trpE</sub> -Rmut-OEX-F | TTCGTTTGGCACAAAAGAAATCAGCGATCGCCAAAAGTAGGGC                  |
| P <sub>trpE</sub> -Rmut-OEX-R | TTCTTTTGTGCCAAACGAATTCAACAATCAAACCAATTCACTATCT<br>CCAAAAGAAG |
| P <sub>trpE</sub> -XhoI-F     | ATATACTCGAGTTCAGTTACCAATAGAACTATCAGCCATATAG                  |
| R-bind 29mer top              | GTAGGCGAGGGGTCTAACCCCTCATTACC                                |
| R-bind 29mer btm              | GGTAATGAGGGGTTAGACCCCTCGCCTAC                                |
| R-bsmut 29mer top             | GTAGGCGATTTGTCTAACAAATCATTACC                                |
| R-bsmut 29mer btm             | GGTAATGATTTGTTAGACAAATCGCCTAC                                |
| trpE-110                      | TTGAATGATGGGTTACACCCCTCAATCAG                                |
| trpE-110-C                    | CTGATTGAGGGGTGTAACCCATCATTCAA                                |
| trpE-BamHI-F                  | ATATAGGATCCATGAATTACTATACACTTGCTTACACAACC                    |
| trpE-155-F                    | CTGTAGGAAATGTTTTGTGCTG                                       |
| trpE-155-R                    | TGGAGGGAGTATAGCGCGAACGG                                      |
| trpE-BglIII-R                 | AGATCTAGAGTAAATTGATGTTTCTAAAGTTTGGG                          |
| trpE-down-out                 | GGTAAGGATTTTGTCTGCAAAGCTGTCAAG                               |
| trpE-Rmutfull                 | TTGAATTCGTTTGGCACAAAAGAAATCAG                                |
| trpE-Rmutfull-C               | CTGATTTCTTTTGTGCCAAACGAATTCAA                                |
| trpE-int-R                    | CCTGTGATGTAGTCATGATTGAGGCTG                                  |
| trpE-NdeI-F                   | CATATGAATTACTATACACTTGCTTACACAACC                            |
| trpE-out-F                    | GCTATCATCTTCAATAACCAGGATTG                                   |
| trpE-SacI-R                   | ATATAGAGCTCCTAAGAGTAAATTGATGTTTCTAAAGTTTGGG                  |
| trpE-up-out                   | GGGGATAAAACATCGTACAATTCCTC                                   |
| YFP-SacI-R                    | ATATAGAGCTCTCAGCTGGTGTCTCCGGAAC                              |

<sup>a</sup>Oligonucleotides are shown in the 5' to 3' direction.

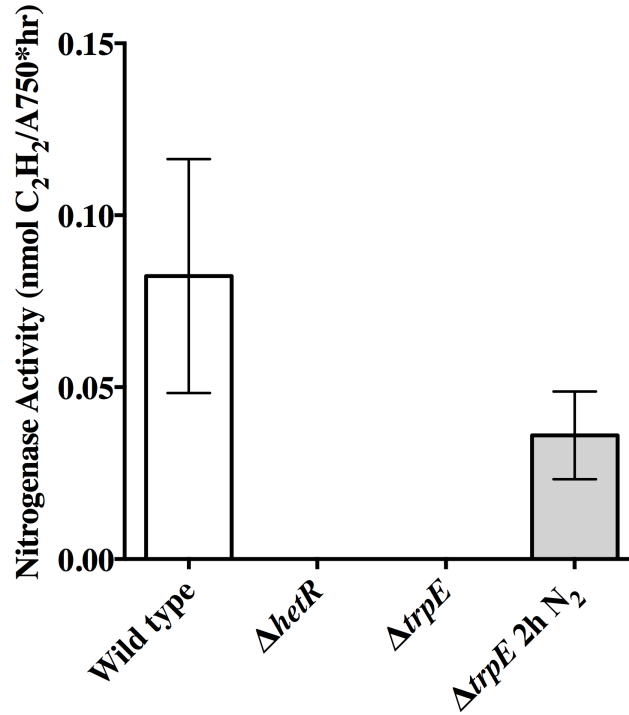

**Figure S1.** Heterocysts produced by the  $\Delta trpE$  mutant only fix in the absence of combined nitrogen. Nitrogenase activity was assessed by acetylene reduction assay from cultures of the wild type and the  $\Delta hetR$  mutant (UHM103) maintained in the absence of combined nitrogen and the  $\Delta trpE$  mutant (UHM335) grown continuously on nitrate or 2 h after the removal of nitrate (2h N<sub>2</sub>). Assays were run in triplicate. Error bars represent the standard deviation.

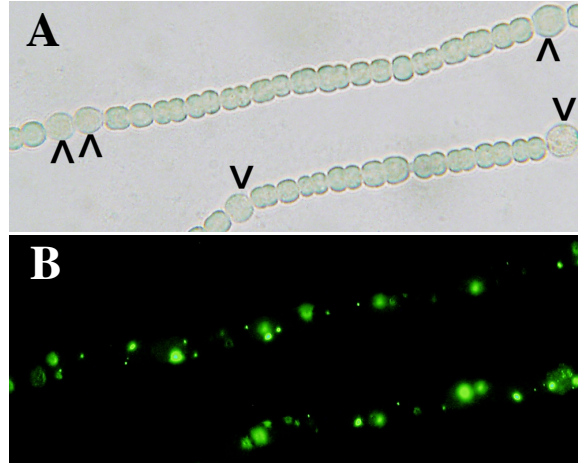

**Figure S2.** Subcellular localization of TrpE. Bright-field (A) and fluorescence (B) micrographs of the  $\Delta trpE$  mutant containing a plasmid bearing a C-terminal translational fusion of TrpE to YFP that was expressed from the *petE* promoter, induced with 2  $\mu$ M copper. Fluorescence was false-colored green. Images were taken 24 hours after the removal of combined nitrogen following growth on nitrate. Carets indicate heterocysts.

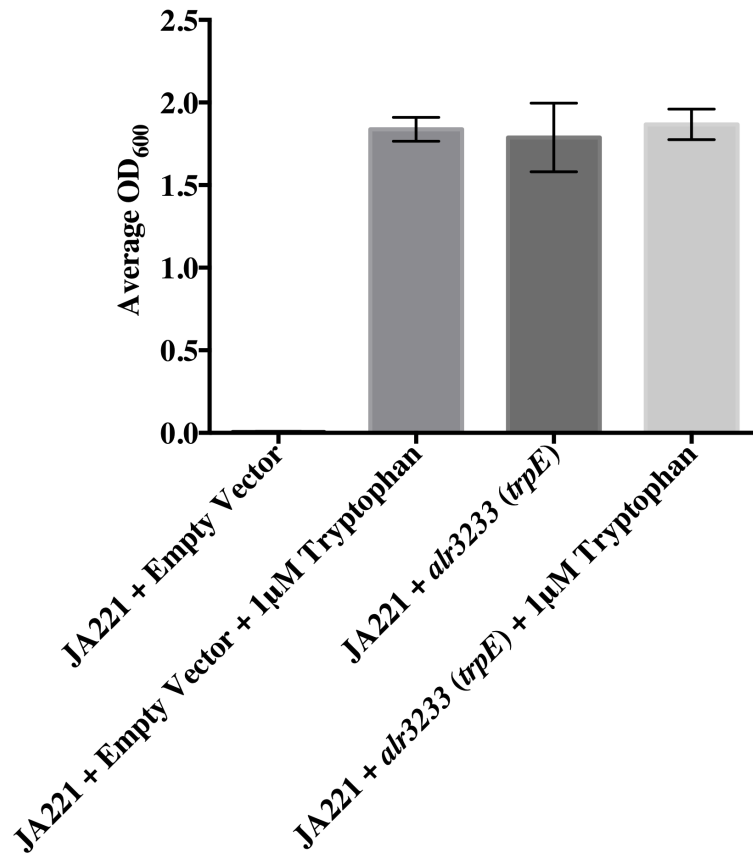

**Figure S3.** The *alr3233* gene can complement an *E. coli* strain JA221 (a  $\Delta trpE$  mutant). JA221 harboring a plasmid with *alr3233* (*trpE*) controlled by the arabinose-inducible *araBAD* promoter or an empty vector was grown in M9 minimal medium either with or without 1  $\mu$ M L-tryptophan. Cultures were inoculated at an optical density at 600 nm ( $OD_{600}$ ) of 0.05, expression was induced with the addition of a final concentration of 0.2% L-arabinose, and the final  $OD_{600}$  was recorded after overnight growth. All treatments were conducted in triplicate. Error bars represent the standard deviation.

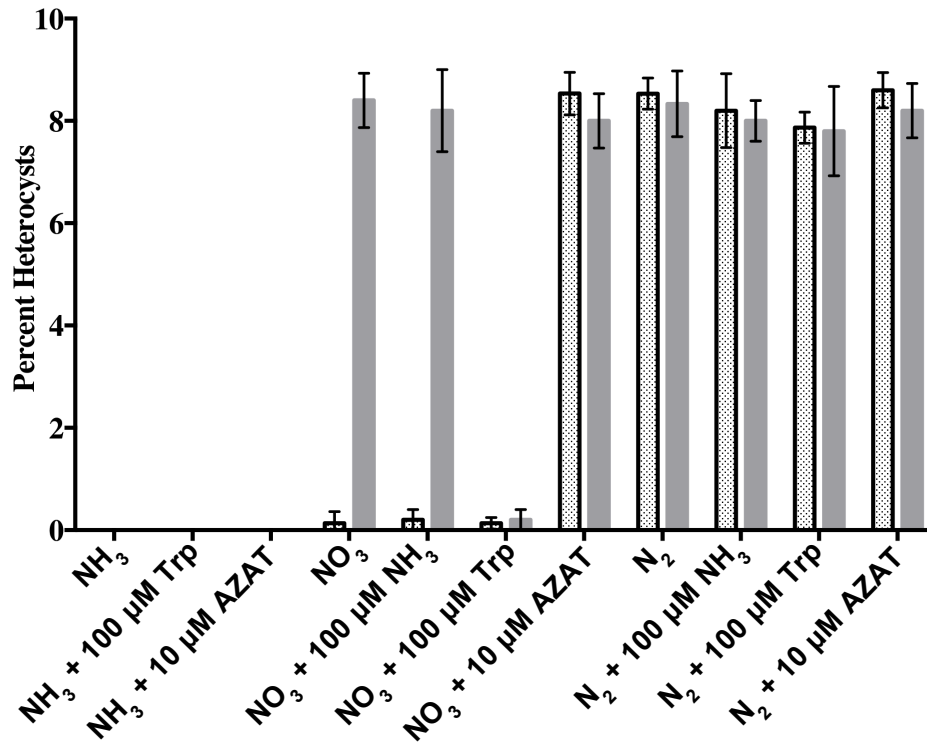

**Figure S4.** Tryptophan complements the  $\Delta trpE$  mutant (UHM335), and DL-7-azatryptotphan (AZAT) promotes differentiation. The wild type (dotted bars) and UHM335 (grey bars) were incubated with either 10  $\mu$ M AZAT, 100  $\mu$ M DL-tryptophan (Trp), or 100  $\mu$ M ammonia (NH<sub>3</sub>) during growth on medium containing 6mM NH<sub>3</sub>, 17.6 mM nitrate (NO<sub>3</sub>), or lacking a source of combined nitrogen (N<sub>2</sub>). Average heterocyst percentages were determined from counts of 500 cells in triplicate. Error bars represent the standard deviation.
